# Supplementary material
Source: MDPI journal article supplement (https://www.mdpi.com/2076-0760/6/3/90)
Supplement: s1 [file s1]

## Sheet: Sheet1
GET
FILE='C:\Users\HP 15\Downloads\gha_r6_data (1).sav'.
DATASET NAME DataSet1 WINDOW=FRONT.
FREQUENCIES VARIABLES=Q55C
/BARCHART FREQ
/ORDER=ANALYSIS.
Frequencies
Notes
Output Created		30-MAY-2017 17:03:16
Comments
Input	Data	C:\Users\HP 15\Downloads\gha_r6_data (1).sav
	Active Dataset	DataSet1
	Filter	<none>
	Weight	within country weighting factor
	Split File	<none>
	N of Rows in Working Data File	2400
Missing Value Handling	Definition of Missing	User-defined missing values are treated as missing.
	Cases Used	Statistics are based on all cases with valid data.
Syntax		FREQUENCIES VARIABLES=Q55C /BARCHART FREQ /ORDER=ANALYSIS.
Resources	Processor Time	00:00:02.48
	Elapsed Time	00:00:04.76
[DataSet1] C:\Users\HP 15\Downloads\gha_r6_data (1).sav
Statistics
Q55c. Difficulty to obtain medical treatment
N	Valid	2400
	Missing	0
Q55c. Difficulty to obtain medical treatment
		Frequency	Percent	Valid Percent	Cumulative Percent
Valid	Very Easy	238.16	9.92335	9.92335	9.92335
	Easy	326.272	13.5947	13.5947	23.518
	Difficult	271.75	11.3229	11.3229	34.8409
	Very Difficult	194.21	8.09207	8.09207	42.933
	No contact	1363.16	56.7983	56.7983	99.7312
	Don't know	6.45031	0.268763	0.268763	100
	Total	2400	100	100
FREQUENCIES VARIABLES=EA_FAC_D
/BARCHART FREQ
/ORDER=ANALYSIS.
Frequencies
Notes
Output Created		30-MAY-2017 17:13:40
Comments
Input	Data	C:\Users\HP 15\Downloads\gha_r6_data (1).sav
	Active Dataset	DataSet1
	Filter	<none>
	Weight	within country weighting factor
	Split File	<none>
	N of Rows in Working Data File	2400
Missing Value Handling	Definition of Missing	User-defined missing values are treated as missing.
	Cases Used	Statistics are based on all cases with valid data.
Syntax		FREQUENCIES VARIABLES=EA_FAC_D /BARCHART FREQ /ORDER=ANALYSIS.
Resources	Processor Time	00:00:00.52
	Elapsed Time	00:00:00.48
[DataSet1] C:\Users\HP 15\Downloads\gha_r6_data (1).sav
Statistics
EA-FAC-D. Health Clinic in the PSU/EA
N	Valid	2400
	Missing	0
EA-FAC-D. Health Clinic in the PSU/EA
		Frequency	Percent	Valid Percent	Cumulative Percent
Valid	No	1134.04	47.2516	47.2516	47.2516
	Yes	1265.96	52.7484	52.7484	100
	Total	2400	100	100
FREQUENCIES VARIABLES=Q8C
/BARCHART FREQ
/ORDER=ANALYSIS.
Frequencies
Notes
Output Created		30-MAY-2017 17:17:43
Comments
Input	Data	C:\Users\HP 15\Downloads\gha_r6_data (1).sav
	Active Dataset	DataSet1
	Filter	<none>
	Weight	within country weighting factor
	Split File	<none>
	N of Rows in Working Data File	2400
Missing Value Handling	Definition of Missing	User-defined missing values are treated as missing.
	Cases Used	Statistics are based on all cases with valid data.
Syntax		FREQUENCIES VARIABLES=Q8C /BARCHART FREQ /ORDER=ANALYSIS.
Resources	Processor Time	00:00:00.55
	Elapsed Time	00:00:00.56
[DataSet1] C:\Users\HP 15\Downloads\gha_r6_data (1).sav
Statistics
Q8c. How often gone without medical care
N	Valid	2400
	Missing	0
Q8c. How often gone without medical care
		Frequency	Percent	Valid Percent	Cumulative Percent
Valid	Missing	5.32324	0.221802	0.221802	0.221802
	Never	1773.48	73.8948	73.8948	74.1166
	Just once or twice	256.281	10.6784	10.6784	84.795
	Several times	232.972	9.70715	9.70715	94.5021
	Many times	82.3203	3.43001	3.43001	97.9321
	Always	45.0555	1.87731	1.87731	99.8094
	Don't Know	4.57321	0.19055	0.19055	100
	Total	2400	100	100
FREQUENCIES VARIABLES=Q8C EA_FAC_D Q55C
/BARCHART PERCENT
/ORDER=ANALYSIS.
Frequencies
Notes
Output Created		30-MAY-2017 18:06:52
Comments
Input	Data	C:\Users\HP 15\Downloads\gha_r6_data (1).sav
	Active Dataset	DataSet1
	Filter	<none>
	Weight	within country weighting factor
	Split File	<none>
	N of Rows in Working Data File	2400
Missing Value Handling	Definition of Missing	User-defined missing values are treated as missing.
	Cases Used	Statistics are based on all cases with valid data.
Syntax		FREQUENCIES VARIABLES=Q8C EA_FAC_D Q55C /BARCHART PERCENT /ORDER=ANALYSIS.
Resources	Processor Time	00:00:01.36
	Elapsed Time	00:00:01.41
[DataSet1] C:\Users\HP 15\Downloads\gha_r6_data (1).sav
Statistics
		Q8c. How often gone without medical care	EA-FAC-D. Health Clinic in the PSU/EA	Q55c. Difficulty to obtain medical treatment
N	Valid	2400	2400	2400
	Missing	0	0	0
Frequency Table
Q8c. How often gone without medical care
		Frequency	Percent	Valid Percent	Cumulative Percent
Valid	Missing	5.32324	0.221802	0.221802	0.221802
	Never	1773.48	73.8948	73.8948	74.1166
	Just once or twice	256.281	10.6784	10.6784	84.795
	Several times	232.972	9.70715	9.70715	94.5021
	Many times	82.3203	3.43001	3.43001	97.9321
	Always	45.0555	1.87731	1.87731	99.8094
	Don't Know	4.57321	0.19055	0.19055	100
	Total	2400	100	100
EA-FAC-D. Health Clinic in the PSU/EA
		Frequency	Percent	Valid Percent	Cumulative Percent
Valid	No	1134.04	47.2516	47.2516	47.2516
	Yes	1265.96	52.7484	52.7484	100
	Total	2400	100	100
Q55c. Difficulty to obtain medical treatment
		Frequency	Percent	Valid Percent	Cumulative Percent
Valid	Very Easy	238.16	9.92335	9.92335	9.92335
	Easy	326.272	13.5947	13.5947	23.518
	Difficult	271.75	11.3229	11.3229	34.8409
	Very Difficult	194.21	8.09207	8.09207	42.933
	No contact	1363.16	56.7983	56.7983	99.7312
	Don't know	6.45031	0.268763	0.268763	100
	Total	2400	100	100
Bar Chart
GRAPH
/BAR(SIMPLE)=PCT BY EA_FAC_D
/PANEL ROWVAR=Q8C Q55C ROWOP=CROSS.
Graph
Notes
Output Created		30-MAY-2017 18:22:18
Comments
Input	Data	C:\Users\HP 15\Downloads\gha_r6_data (1).sav
	Active Dataset	DataSet1
	Filter	<none>
	Weight	within country weighting factor
	Split File	<none>
	N of Rows in Working Data File	2400
Syntax		GRAPH /BAR(SIMPLE)=PCT BY EA_FAC_D /PANEL ROWVAR=Q8C Q55C ROWOP=CROSS.
Resources	Processor Time	00:00:00.45
	Elapsed Time	00:00:00.60
[DataSet1] C:\Users\HP 15\Downloads\gha_r6_data (1).sav
GRAPH
/BAR(SIMPLE)=PCT BY Q8C.
Graph
Notes
Output Created		30-MAY-2017 18:26:23
Comments
Input	Data	C:\Users\HP 15\Downloads\gha_r6_data (1).sav
	Active Dataset	DataSet1
	Filter	<none>
	Weight	within country weighting factor
	Split File	<none>
	N of Rows in Working Data File	2400
Syntax		GRAPH /BAR(SIMPLE)=PCT BY Q8C.
Resources	Processor Time	00:00:00.45
	Elapsed Time	00:00:00.43
[DataSet1] C:\Users\HP 15\Downloads\gha_r6_data (1).sav
CROSSTABS
/TABLES=EA_FAC_D Q8C Q55C BY URBRUR
/FORMAT=AVALUE TABLES
/CELLS=COUNT
/COUNT ROUND CELL.
Crosstabs
Notes
Output Created		30-MAY-2017 19:47:20
Comments
Input	Data	C:\Users\HP 15\Downloads\gha_r6_data (1).sav
	Active Dataset	DataSet1
	Filter	<none>
	Weight	within country weighting factor
	Split File	<none>
	N of Rows in Working Data File	2400
Missing Value Handling	Definition of Missing	User-defined missing values are treated as missing.
	Cases Used	Statistics for each table are based on all the cases with valid data in the specified range(s) for all variables in each table.
Syntax		CROSSTABS /TABLES=EA_FAC_D Q8C Q55C BY URBRUR /FORMAT=AVALUE TABLES /CELLS=COUNT /COUNT ROUND CELL.
Resources	Processor Time	00:00:00.03
	Elapsed Time	00:00:00.76
	Dimensions Requested	2
	Cells Available	174762
[DataSet1] C:\Users\HP 15\Downloads\gha_r6_data (1).sav
Case Processing Summary
	Cases
	Valid		Missing		Total
	N	Percent	N	Percent	N	Percent
EA-FAC-D. Health Clinic in the PSU/EA * Urban or rural Primary Sampling Unit	2400a	1	0	0	2400	1
Q8c. How often gone without medical care * Urban or rural Primary Sampling Unit	2401a	1	0	0	2400	1
Q55c. Difficulty to obtain medical treatment * Urban or rural Primary Sampling Unit	2400a	1	0	0	2400	1
a. Number of valid cases is different from the total count in the crosstabulation table because the cell counts have been rounded.
EA-FAC-D. Health Clinic in the PSU/EA * Urban or rural Primary Sampling Unit Crosstabulation
Count
		Urban or rural Primary Sampling Unit		Total
		Urban	Rural
EA-FAC-D. Health Clinic in the PSU/EA	No	406	728	1134
	Yes	899	367	1266
Total		1305	1095	2400
Q8c. How often gone without medical care * Urban or rural Primary Sampling Unit Crosstabulation
Count
		Urban or rural Primary Sampling Unit		Total
		Urban	Rural
Q8c. How often gone without medical care	Missing	5	1	6
	Never	1029	744	1773
	Just once or twice	117	140	257
	Several times	105	128	233
	Many times	35	47	82
	Always	14	31	45
	Don't Know	1	4	5
Total		1306	1095	2401
Q55c. Difficulty to obtain medical treatment * Urban or rural Primary Sampling Unit Crosstabulation
Count
		Urban or rural Primary Sampling Unit		Total
		Urban	Rural
Q55c. Difficulty to obtain medical treatment	Very Easy	109	129	238
	Easy	170	156	326
	Difficult	154	118	272
	Very Difficult	112	82	194
	No contact	757	607	1364
	Don't know	3	3	6
Total		1305	1095	2400
FREQUENCIES VARIABLES=Q65C
/ORDER=ANALYSIS.
Frequencies
Notes
Output Created		30-MAY-2017 22:05:49
Comments
Input	Data	C:\Users\HP 15\Downloads\gha_r6_data (1).sav
	Active Dataset	DataSet1
	Filter	<none>
	Weight	within country weighting factor
	Split File	<none>
	N of Rows in Working Data File	2400
Missing Value Handling	Definition of Missing	User-defined missing values are treated as missing.
	Cases Used	Statistics are based on all cases with valid data.
Syntax		FREQUENCIES VARIABLES=Q65C /ORDER=ANALYSIS.
Resources	Processor Time	00:00:00.05
	Elapsed Time	00:00:01.48
[DataSet1] C:\Users\HP 15\Downloads\gha_r6_data (1).sav
Statistics
Q65c. Pay more taxes to increase health spending
N	Valid	2400
	Missing	0
Q65c. Pay more taxes to increase health spending
		Frequency	Percent	Valid Percent	Cumulative Percent
Valid	Missing	16.3388	0.680782	0.680782	0.680782
	Strongly oppose	823.771	34.3238	34.3238	35.0046
	Somewhat oppose	265.188	11.0495	11.0495	46.0541
	Neither support nor oppose	122.889	5.12039	5.12039	51.1745
	Somewhat support	291.107	12.1294	12.1294	63.3039
	Strongly support	683.9	28.4959	28.4959	91.7998
	It depends	151.789	6.32452	6.32452	98.1243
	Don't know	45.017	1.87571	1.87571	100
	Total	2400	100	100
CROSSTABS
/TABLES=EA_FAC_D Q8C Q55C BY URBRUR
/FORMAT=AVALUE TABLES
/CELLS=COUNT EXPECTED
/COUNT ROUND CELL
/HIDESMALLCOUNTS COUNT=5.
Crosstabs
Notes
Output Created		30-MAY-2017 22:14:07
Comments
Input	Data	C:\Users\HP 15\Downloads\gha_r6_data (1).sav
	Active Dataset	DataSet1
	Filter	<none>
	Weight	within country weighting factor
	Split File	<none>
	N of Rows in Working Data File	2400
Missing Value Handling	Definition of Missing	User-defined missing values are treated as missing.
	Cases Used	Statistics for each table are based on all the cases with valid data in the specified range(s) for all variables in each table.
Syntax		CROSSTABS /TABLES=EA_FAC_D Q8C Q55C BY URBRUR /FORMAT=AVALUE TABLES /CELLS=COUNT EXPECTED /COUNT ROUND CELL /HIDESMALLCOUNTS COUNT=5.
Resources	Processor Time	00:00:00.03
	Elapsed Time	00:00:00.85
	Dimensions Requested	2
	Cells Available	174762
[DataSet1] C:\Users\HP 15\Downloads\gha_r6_data (1).sav
Case Processing Summary
	Cases
	Valid		Missing		Total
	N	Percent	N	Percent	N	Percent
EA-FAC-D. Health Clinic in the PSU/EA * Urban or rural Primary Sampling Unit	2400a	1	0	0	2400	1
Q8c. How often gone without medical care * Urban or rural Primary Sampling Unit	2401a	1	0	0	2400	1
Q55c. Difficulty to obtain medical treatment * Urban or rural Primary Sampling Unit	2400a	1	0	0	2400	1
a. Number of valid cases is different from the total count in the crosstabulation table because the cell counts have been rounded.
EA-FAC-D. Health Clinic in the PSU/EA * Urban or rural Primary Sampling Unit Crosstabulation
			Urban or rural Primary Sampling Unit		Total
			Urban	Rural
EA-FAC-D. Health Clinic in the PSU/EA	No	Count	406	728	1134
		Expected Count	616.612	517.388	1134
	Yes	Count	899	367	1266
		Expected Count	688.388	577.612	1266
Total		Count	1305	1095	2400
		Expected Count	1305	1095	2400
Q8c. How often gone without medical care * Urban or rural Primary Sampling Unit Crosstabulation
			Urban or rural Primary Sampling Unit		Total
			Urban	Rural
Q8c. How often gone without medical care	Missing	Count	5	<5	6
		Expected Count	3.26364	2.73636	6
	Never	Count	1029	744	1773
		Expected Count	964.406	808.594	1773
	Just once or twice	Count	117	140	257
		Expected Count	139.793	117.207	257
	Several times	Count	105	128	233
		Expected Count	126.738	106.262	233
	Many times	Count	35	47	82
		Expected Count	44.6031	37.3969	82
	Always	Count	14	31	45
		Expected Count	24.4773	20.5227	45
	Don't Know	Count	<5	<5	5
		Expected Count	2.7197	2.2803	5
Total		Count	1306	1095	2401
		Expected Count	1306	1095	2401
Q55c. Difficulty to obtain medical treatment * Urban or rural Primary Sampling Unit Crosstabulation
			Urban or rural Primary Sampling Unit		Total
			Urban	Rural
Q55c. Difficulty to obtain medical treatment	Very Easy	Count	109	129	238
		Expected Count	129.412	108.588	238
	Easy	Count	170	156	326
		Expected Count	177.262	148.738	326
	Difficult	Count	154	118	272
		Expected Count	147.9	124.1	272
	Very Difficult	Count	112	82	194
		Expected Count	105.487	88.5125	194
	No contact	Count	757	607	1364
		Expected Count	741.675	622.325	1364
	Don't know	Count	<5	<5	6
		Expected Count	3.2625	2.7375	6
Total		Count	1305	1095	2400
		Expected Count	1305	1095	2400
CROSSTABS
/TABLES=URBRUR Q101 Q117 Q95 BY Q65C
/FORMAT=AVALUE TABLES
/CELLS=COUNT EXPECTED
/COUNT ROUND CELL
/HIDESMALLCOUNTS COUNT=5.
Crosstabs
Notes
Output Created		31-MAY-2017 03:28:52
Comments
Input	Data	C:\Users\HP 15\Downloads\gha_r6_data (1).sav
	Active Dataset	DataSet1
	Filter	<none>
	Weight	within country weighting factor
	Split File	<none>
	N of Rows in Working Data File	2400
Missing Value Handling	Definition of Missing	User-defined missing values are treated as missing.
	Cases Used	Statistics for each table are based on all the cases with valid data in the specified range(s) for all variables in each table.
Syntax		CROSSTABS /TABLES=URBRUR Q101 Q117 Q95 BY Q65C /FORMAT=AVALUE TABLES /CELLS=COUNT EXPECTED /COUNT ROUND CELL /HIDESMALLCOUNTS COUNT=5.
Resources	Processor Time	00:00:00.05
	Elapsed Time	00:00:00.41
	Dimensions Requested	2
	Cells Available	174762
[DataSet1] C:\Users\HP 15\Downloads\gha_r6_data (1).sav
Case Processing Summary
	Cases
	Valid		Missing		Total
	N	Percent	N	Percent	N	Percent
Urban or rural Primary Sampling Unit * Q65c. Pay more taxes to increase health spending	2399a	0.999583	1	0.000416667	2400	1
Q101. Gender of respondent * Q65c. Pay more taxes to increase health spending	2399a	0.999583	1	0.000416667	2400	1
Q117. Interviewer's education * Q65c. Pay more taxes to increase health spending	2404a	1	0	0	2400	1
Q95. Employment status * Q65c. Pay more taxes to increase health spending	2400a	1	0	0	2400	1
a. Number of valid cases is different from the total count in the crosstabulation table because the cell counts have been rounded.
Urban or rural Primary Sampling Unit * Q65c. Pay more taxes to increase health spending Crosstabulation
			Q65c. Pay more taxes to increase health spending								Total
			Missing	Strongly oppose	Somewhat oppose	Neither support nor oppose	Somewhat support	Strongly support	It depends	Don't know
Urban or rural Primary Sampling Unit	Urban	Count	9	507	149	68	149	331	74	17	1304
		Expected Count	9.24052	447.35	144.043	66.8579	158.176	371.795	82.0775	24.4602	1304
	Rural	Count	8	316	116	55	142	353	77	28	1095
		Expected Count	7.75948	375.65	120.957	56.1421	132.824	312.205	68.9225	20.5398	1095
Total		Count	17	823	265	123	291	684	151	45	2399
		Expected Count	17	823	265	123	291	684	151	45	2399
Q101. Gender of respondent * Q65c. Pay more taxes to increase health spending Crosstabulation
			Q65c. Pay more taxes to increase health spending								Total
			Missing	Strongly oppose	Somewhat oppose	Neither support nor oppose	Somewhat support	Strongly support	It depends	Don't know
Q101. Gender of respondent	Male	Count	10	432	135	63	118	354	74	12	1198
		Expected Count	7.99	411.485	132.334	60.9237	145.318	341.572	75.905	22.4719	1198
	Female	Count	6	392	130	59	173	330	78	33	1201
		Expected Count	8.01	412.515	132.666	61.0763	145.682	342.428	76.095	22.5281	1201
Total		Count	16	824	265	122	291	684	152	45	2399
		Expected Count	16	824	265	122	291	684	152	45	2399
Q117. Interviewer's education * Q65c. Pay more taxes to increase health spending Crosstabulation
			Q65c. Pay more taxes to increase health spending								Total
			Missing	Strongly oppose	Somewhat oppose	Neither support nor oppose	Somewhat support	Strongly support	It depends	Don't know
Q117. Interviewer's education	Some secondary school / high school	Count	<5	<5	<5	<5	<5	<5	<5	<5	<5
		Expected Count	n<5	n<5	n<5	n<5	n<5	n<5	n<5	n<5	<5
	Post-secondary qualifications, other than university	Count	6	336	92	55	115	205	69	28	906
		Expected Count	6.02995	310.919	100.248	46.7321	110.047	257.78	56.9077	17.3361	906
	Some university	Count	<5	26	27	<5	6	10	<5	<5	74
		Expected Count	0.492512	25.3952	8.18802	3.81697	8.98835	21.0549	4.64809	1.41597	74
	University completed	Count	7	315	92	37	114	305	58	12	940
		Expected Count	6.25624	322.587	104.01	48.4859	114.176	267.454	59.0433	17.9867	940
	Post graduate	Count	<5	148	55	29	56	164	23	5	483
		Expected Count	3.21464	165.755	53.4434	24.9135	58.6672	137.426	30.3382	9.2421	483
Total		Count	16	825	266	124	292	684	151	46	2404
		Expected Count	16	825	266	124	292	684	151	46	2404
Q95. Employment status * Q65c. Pay more taxes to increase health spending Crosstabulation
			Q65c. Pay more taxes to increase health spending								Total
			Missing	Strongly oppose	Somewhat oppose	Neither support nor oppose	Somewhat support	Strongly support	It depends	Don't know
Q95. Employment status	Missing	Count	<5	<5	<5	<5	<5	<5	<5	<5	14
		Expected Count	0.0933333	4.8125	1.54583	0.7175	1.6975	3.99	0.880833	0.2625	14
	No (not looking)	Count	<5	144	48	14	48	102	44	7	407
		Expected Count	2.71333	139.906	44.9396	20.8588	49.3488	115.995	25.6071	7.63125	407
	No (looking)	Count	<5	144	47	25	59	120	20	12	430
		Expected Count	2.86667	147.812	47.4792	22.0375	52.1375	122.55	27.0542	8.0625	430
	Yes, part time	Count	<5	90	30	10	28	87	13	7	268
		Expected Count	1.78667	92.125	29.5917	13.735	32.495	76.38	16.8617	5.025	268
	Yes, full time	Count	9	441	139	69	153	372	73	18	1274
		Expected Count	8.49333	437.938	140.671	65.2925	154.472	363.09	80.1558	23.8875	1274
	Don't know	Count	<5	<5	<5	<5	<5	<5	<5	<5	7
		Expected Count	0.0466667	2.40625	0.772917	0.35875	0.84875	1.995	0.440417	0.13125	7
Total		Count	16	825	265	123	291	684	151	45	2400
		Expected Count	16	825	265	123	291	684	151	45	2400
CROSSTABS
/TABLES=URBRUR Q101 Q117 Q95 BY Q65C
/FORMAT=AVALUE TABLES
/CELLS=COUNT
/COUNT ROUND CELL.
Crosstabs
Notes
Output Created		31-MAY-2017 03:30:00
Comments
Input	Data	C:\Users\HP 15\Downloads\gha_r6_data (1).sav
	Active Dataset	DataSet1
	Filter	<none>
	Weight	within country weighting factor
	Split File	<none>
	N of Rows in Working Data File	2400
Missing Value Handling	Definition of Missing	User-defined missing values are treated as missing.
	Cases Used	Statistics for each table are based on all the cases with valid data in the specified range(s) for all variables in each table.
Syntax		CROSSTABS /TABLES=URBRUR Q101 Q117 Q95 BY Q65C /FORMAT=AVALUE TABLES /CELLS=COUNT /COUNT ROUND CELL.
Resources	Processor Time	00:00:00.06
	Elapsed Time	00:00:00.13
	Dimensions Requested	2
	Cells Available	174762
[DataSet1] C:\Users\HP 15\Downloads\gha_r6_data (1).sav
Case Processing Summary
	Cases
	Valid		Missing		Total
	N	Percent	N	Percent	N	Percent
Urban or rural Primary Sampling Unit * Q65c. Pay more taxes to increase health spending	2399a	0.999583	1	0.000416667	2400	1
Q101. Gender of respondent * Q65c. Pay more taxes to increase health spending	2399a	0.999583	1	0.000416667	2400	1
Q117. Interviewer's education * Q65c. Pay more taxes to increase health spending	2404a	1	0	0	2400	1
Q95. Employment status * Q65c. Pay more taxes to increase health spending	2400a	1	0	0	2400	1
a. Number of valid cases is different from the total count in the crosstabulation table because the cell counts have been rounded.
Urban or rural Primary Sampling Unit * Q65c. Pay more taxes to increase health spending Crosstabulation
Count
		Q65c. Pay more taxes to increase health spending								Total
		Missing	Strongly oppose	Somewhat oppose	Neither support nor oppose	Somewhat support	Strongly support	It depends	Don't know
Urban or rural Primary Sampling Unit	Urban	9	507	149	68	149	331	74	17	1304
	Rural	8	316	116	55	142	353	77	28	1095
Total		17	823	265	123	291	684	151	45	2399
Q101. Gender of respondent * Q65c. Pay more taxes to increase health spending Crosstabulation
Count
		Q65c. Pay more taxes to increase health spending								Total
		Missing	Strongly oppose	Somewhat oppose	Neither support nor oppose	Somewhat support	Strongly support	It depends	Don't know
Q101. Gender of respondent	Male	10	432	135	63	118	354	74	12	1198
	Female	6	392	130	59	173	330	78	33	1201
Total		16	824	265	122	291	684	152	45	2399
Q117. Interviewer's education * Q65c. Pay more taxes to increase health spending Crosstabulation
Count
		Q65c. Pay more taxes to increase health spending								Total
		Missing	Strongly oppose	Somewhat oppose	Neither support nor oppose	Somewhat support	Strongly support	It depends	Don't know
Q117. Interviewer's education	Some secondary school / high school	0	0	0	0	1	0	0	0	1
	Post-secondary qualifications, other than university	6	336	92	55	115	205	69	28	906
	Some university	0	26	27	3	6	10	1	1	74
	University completed	7	315	92	37	114	305	58	12	940
	Post graduate	3	148	55	29	56	164	23	5	483
Total		16	825	266	124	292	684	151	46	2404
Q95. Employment status * Q65c. Pay more taxes to increase health spending Crosstabulation
Count
		Q65c. Pay more taxes to increase health spending								Total
		Missing	Strongly oppose	Somewhat oppose	Neither support nor oppose	Somewhat support	Strongly support	It depends	Don't know
Q95. Employment status	Missing	1	4	1	3	0	3	1	1	14
	No (not looking)	0	144	48	14	48	102	44	7	407
	No (looking)	3	144	47	25	59	120	20	12	430
	Yes, part time	3	90	30	10	28	87	13	7	268
	Yes, full time	9	441	139	69	153	372	73	18	1274
	Don't know	0	2	0	2	3	0	0	0	7
Total		16	825	265	123	291	684	151	45	2400
CROSSTABS
/TABLES=EA_FAC_D Q8C Q55C Q55D BY Q65C
/FORMAT=AVALUE TABLES
/CELLS=COUNT ROW
/COUNT ROUND CELL.
Crosstabs
Notes
Output Created		31-MAY-2017 04:26:54
Comments
Input	Data	C:\Users\HP 15\Downloads\gha_r6_data (1).sav
	Active Dataset	DataSet1
	Filter	<none>
	Weight	within country weighting factor
	Split File	<none>
	N of Rows in Working Data File	2400
Missing Value Handling	Definition of Missing	User-defined missing values are treated as missing.
	Cases Used	Statistics for each table are based on all the cases with valid data in the specified range(s) for all variables in each table.
Syntax		CROSSTABS /TABLES=EA_FAC_D Q8C Q55C Q55D BY Q65C /FORMAT=AVALUE TABLES /CELLS=COUNT ROW /COUNT ROUND CELL.
Resources	Processor Time	00:00:00.06
	Elapsed Time	00:00:00.07
	Dimensions Requested	2
	Cells Available	174762
[DataSet1] C:\Users\HP 15\Downloads\gha_r6_data (1).sav
Case Processing Summary
	Cases
	Valid		Missing		Total
	N	Percent	N	Percent	N	Percent
EA-FAC-D. Health Clinic in the PSU/EA * Q65c. Pay more taxes to increase health spending	2399a	0.999583	1	0.000416667	2400	1
Q8c. How often gone without medical care * Q65c. Pay more taxes to increase health spending	2401a	1	0	0	2400	1
Q55c. Difficulty to obtain medical treatment * Q65c. Pay more taxes to increase health spending	2398a	0.999167	2	0.000833333	2400	1
Q55d. Pay bribe for treatment at public clinic or hospital * Q65c. Pay more taxes to increase health spending	2400a	1	0	0	2400	1
a. Number of valid cases is different from the total count in the crosstabulation table because the cell counts have been rounded.
EA-FAC-D. Health Clinic in the PSU/EA * Q65c. Pay more taxes to increase health spending Crosstabulation
			Q65c. Pay more taxes to increase health spending								Total
			Missing	Strongly oppose	Somewhat oppose	Neither support nor oppose	Somewhat support	Strongly support	It depends	Don't know
EA-FAC-D. Health Clinic in the PSU/EA	No	Count	8	362	133	70	136	339	61	24	1133
		% within EA-FAC-D. Health Clinic in the PSU/EA	0.0070609	0.319506	0.117387	0.0617829	0.120035	0.299206	0.0538394	0.0211827	1
	Yes	Count	9	461	132	53	155	345	90	21	1266
		% within EA-FAC-D. Health Clinic in the PSU/EA	0.007109	0.364139	0.104265	0.0418641	0.122433	0.272512	0.07109	0.0165877	1
Total		Count	17	823	265	123	291	684	151	45	2399
		% within EA-FAC-D. Health Clinic in the PSU/EA	0.00708629	0.34306	0.110463	0.0512714	0.121301	0.285119	0.0629429	0.0187578	1
Q8c. How often gone without medical care * Q65c. Pay more taxes to increase health spending Crosstabulation
			Q65c. Pay more taxes to increase health spending								Total
			Missing	Strongly oppose	Somewhat oppose	Neither support nor oppose	Somewhat support	Strongly support	It depends	Don't know
Q8c. How often gone without medical care	Missing	Count	0	1	0	0	4	1	0	0	6
		% within Q8c. How often gone without medical care	0	0.166667	0	0	0.666667	0.166667	0	0	1
	Never	Count	11	622	176	90	214	523	112	25	1773
		% within Q8c. How often gone without medical care	0.00620417	0.350818	0.0992668	0.0507614	0.120699	0.29498	0.0631698	0.0141004	1
	Just once or twice	Count	1	75	41	15	41	58	14	11	256
		% within Q8c. How often gone without medical care	0.00390625	0.292969	0.160156	0.0585938	0.160156	0.226562	0.0546875	0.0429688	1
	Several times	Count	1	75	38	14	21	58	19	8	234
		% within Q8c. How often gone without medical care	0.0042735	0.320513	0.162393	0.0598291	0.0897436	0.247863	0.0811966	0.034188	1
	Many times	Count	1	37	5	2	3	29	5	0	82
		% within Q8c. How often gone without medical care	0.0121951	0.45122	0.0609756	0.0243902	0.0365854	0.353659	0.0609756	0	1
	Always	Count	1	13	4	3	7	13	3	1	45
		% within Q8c. How often gone without medical care	0.0222222	0.288889	0.0888889	0.0666667	0.155556	0.288889	0.0666667	0.0222222	1
	Don't Know	Count	0	0	2	0	1	2	0	0	5
		% within Q8c. How often gone without medical care	0	0	0.4	0	0.2	0.4	0	0	1
Total		Count	15	823	266	124	291	684	153	45	2401
		% within Q8c. How often gone without medical care	0.0062474	0.342774	0.110787	0.0516451	0.1212	0.284881	0.0637234	0.0187422	1
Q55c. Difficulty to obtain medical treatment * Q65c. Pay more taxes to increase health spending Crosstabulation
			Q65c. Pay more taxes to increase health spending								Total
			Missing	Strongly oppose	Somewhat oppose	Neither support nor oppose	Somewhat support	Strongly support	It depends	Don't know
Q55c. Difficulty to obtain medical treatment	Very Easy	Count	0	61	23	13	32	91	15	3	238
		% within Q55c. Difficulty to obtain medical treatment	0	0.256303	0.0966387	0.0546218	0.134454	0.382353	0.0630252	0.012605	1
	Easy	Count	2	101	37	21	43	105	11	5	325
		% within Q55c. Difficulty to obtain medical treatment	0.00615385	0.310769	0.113846	0.0646154	0.132308	0.323077	0.0338462	0.0153846	1
	Difficult	Count	4	101	30	9	32	82	11	2	271
		% within Q55c. Difficulty to obtain medical treatment	0.0147601	0.372694	0.110701	0.0332103	0.118081	0.302583	0.0405904	0.00738007	1
	Very Difficult	Count	0	79	12	7	24	53	12	6	193
		% within Q55c. Difficulty to obtain medical treatment	0	0.409326	0.0621762	0.0362694	0.124352	0.274611	0.0621762	0.0310881	1
	No contact	Count	10	478	163	73	158	352	102	28	1364
		% within Q55c. Difficulty to obtain medical treatment	0.00733138	0.35044	0.119501	0.0535191	0.115836	0.258065	0.0747801	0.0205279	1
	Don't know	Count	0	3	0	0	2	1	0	1	7
		% within Q55c. Difficulty to obtain medical treatment	0	0.428571	0	0	0.285714	0.142857	0	0.142857	1
Total		Count	16	823	265	123	291	684	151	45	2398
		% within Q55c. Difficulty to obtain medical treatment	0.00667223	0.343203	0.110509	0.0512927	0.121351	0.285238	0.0629691	0.0187656	1
Q55d. Pay bribe for treatment at public clinic or hospital * Q65c. Pay more taxes to increase health spending Crosstabulation
			Q65c. Pay more taxes to increase health spending								Total
			Missing	Strongly oppose	Somewhat oppose	Neither support nor oppose	Somewhat support	Strongly support	It depends	Don't know
Q55d. Pay bribe for treatment at public clinic or hospital	Missing	Count	1	43	6	5	4	26	5	0	90
		% within Q55d. Pay bribe for treatment at public clinic or hospital	0.0111111	0.477778	0.0666667	0.0555556	0.0444444	0.288889	0.0555556	0	1
	Never	Count	5	234	87	37	100	252	41	15	771
		% within Q55d. Pay bribe for treatment at public clinic or hospital	0.00648508	0.303502	0.11284	0.0479896	0.129702	0.326848	0.0531777	0.0194553	1
	Once or Twice	Count	0	30	8	5	12	30	3	0	88
		% within Q55d. Pay bribe for treatment at public clinic or hospital	0	0.340909	0.0909091	0.0568182	0.136364	0.340909	0.0340909	0	1
	A Few times	Count	0	17	1	2	11	10	0	0	41
		% within Q55d. Pay bribe for treatment at public clinic or hospital	0	0.414634	0.0243902	0.0487805	0.268293	0.243902	0	0	1
	Often	Count	0	18	1	1	4	11	1	0	36
		% within Q55d. Pay bribe for treatment at public clinic or hospital	0	0.5	0.0277778	0.0277778	0.111111	0.305556	0.0277778	0	1
	No contact	Count	10	478	163	73	158	352	102	28	1364
		% within Q55d. Pay bribe for treatment at public clinic or hospital	0.00733138	0.35044	0.119501	0.0535191	0.115836	0.258065	0.0747801	0.0205279	1
	Don't know	Count	0	4	0	0	2	2	0	2	10
		% within Q55d. Pay bribe for treatment at public clinic or hospital	0	0.4	0	0	0.2	0.2	0	0.2	1
Total		Count	16	824	266	123	291	683	152	45	2400
		% within Q55d. Pay bribe for treatment at public clinic or hospital	0.00666667	0.343333	0.110833	0.05125	0.12125	0.284583	0.0633333	0.01875	1
CROSSTABS
/TABLES=Q66G Q68A Q68B Q52A Q52B Q52D Q50 BY Q65C
/FORMAT=AVALUE TABLES
/CELLS=COUNT ROW
/COUNT ROUND CELL.
Crosstabs
Notes
Output Created		31-MAY-2017 07:06:18
Comments
Input	Data	C:\Users\HP 15\Downloads\gha_r6_data (1).sav
	Active Dataset	DataSet1
	Filter	<none>
	Weight	within country weighting factor
	Split File	<none>
	N of Rows in Working Data File	2400
Missing Value Handling	Definition of Missing	User-defined missing values are treated as missing.
	Cases Used	Statistics for each table are based on all the cases with valid data in the specified range(s) for all variables in each table.
Syntax		CROSSTABS /TABLES=Q66G Q68A Q68B Q52A Q52B Q52D Q50 BY Q65C /FORMAT=AVALUE TABLES /CELLS=COUNT ROW /COUNT ROUND CELL.
Resources	Processor Time	00:00:00.14
	Elapsed Time	00:00:01.68
	Dimensions Requested	2
	Cells Available	174762
[DataSet1] C:\Users\HP 15\Downloads\gha_r6_data (1).sav
Case Processing Summary
	Cases
	Valid		Missing		Total
	N	Percent	N	Percent	N	Percent
Q66g. Handling improving basic health services * Q65c. Pay more taxes to increase health spending	2399a	0.999583	1	0.000416667	2400	1
Q68a. Performance: President * Q65c. Pay more taxes to increase health spending	2399a	0.999583	1	0.000416667	2400	1
Q68b. Performance: MP/National Assembly rep. * Q65c. Pay more taxes to increase health spending	2400a	1	0	0	2400	1
Q52a. Trust president * Q65c. Pay more taxes to increase health spending	2403a	1	0	0	2400	1
Q52b. Trust parliament/national assembly * Q65c. Pay more taxes to increase health spending	2403a	1	0	0	2400	1
Q52d. Trust tax department * Q65c. Pay more taxes to increase health spending	2402a	1	0	0	2400	1
Q50. Leaders serve interests of people or their own * Q65c. Pay more taxes to increase health spending	2402a	1	0	0	2400	1
a. Number of valid cases is different from the total count in the crosstabulation table because the cell counts have been rounded.
Q66g. Handling improving basic health services * Q65c. Pay more taxes to increase health spending Crosstabulation
			Q65c. Pay more taxes to increase health spending								Total
			Missing	Strongly oppose	Somewhat oppose	Neither support nor oppose	Somewhat support	Strongly support	It depends	Don't know
Q66g. Handling improving basic health services	Missing	Count	0	1	1	0	0	1	0	0	3
		% within Q66g. Handling improving basic health services	0	0.333333	0.333333	0	0	0.333333	0	0	1
	Very Badly	Count	5	409	66	34	90	219	60	7	890
		% within Q66g. Handling improving basic health services	0.00561798	0.459551	0.0741573	0.0382022	0.101124	0.246067	0.0674157	0.00786517	1
	Fairly Badly	Count	7	193	101	35	72	121	28	14	571
		% within Q66g. Handling improving basic health services	0.0122592	0.338004	0.176883	0.061296	0.126095	0.211909	0.0490368	0.0245184	1
	Fairly Well	Count	4	174	72	40	95	242	46	10	683
		% within Q66g. Handling improving basic health services	0.00585652	0.254758	0.105417	0.0585652	0.139092	0.354319	0.0673499	0.0146413	1
	Very Well	Count	0	32	18	7	28	89	9	1	184
		% within Q66g. Handling improving basic health services	0	0.173913	0.0978261	0.0380435	0.152174	0.483696	0.048913	0.00543478	1
	Don't know/Haven't heard enough	Count	0	14	7	7	6	12	10	12	68
		% within Q66g. Handling improving basic health services	0	0.205882	0.102941	0.102941	0.0882353	0.176471	0.147059	0.176471	1
Total		Count	16	823	265	123	291	684	153	44	2399
		% within Q66g. Handling improving basic health services	0.00666945	0.34306	0.110463	0.0512714	0.121301	0.285119	0.0637766	0.018341	1
Q68a. Performance: President * Q65c. Pay more taxes to increase health spending Crosstabulation
			Q65c. Pay more taxes to increase health spending								Total
			Missing	Strongly oppose	Somewhat oppose	Neither support nor oppose	Somewhat support	Strongly support	It depends	Don't know
Q68a. Performance: President	Missing	Count	0	0	1	0	0	0	0	0	1
		% within Q68a. Performance: President	0	0	1	0	0	0	0	0	1
	Strongly Disapprove	Count	3	424	68	38	70	207	44	9	863
		% within Q68a. Performance: President	0.00347625	0.491309	0.0787949	0.0440324	0.0811124	0.239861	0.0509849	0.0104287	1
	Disapprove	Count	5	168	97	31	81	129	44	13	568
		% within Q68a. Performance: President	0.00880282	0.295775	0.170775	0.0545775	0.142606	0.227113	0.0774648	0.0228873	1
	Approve	Count	8	151	50	38	102	225	39	9	622
		% within Q68a. Performance: President	0.0128617	0.242765	0.0803859	0.0610932	0.163987	0.361736	0.062701	0.0144695	1
	Strongly Approve	Count	0	57	40	11	29	103	14	4	258
		% within Q68a. Performance: President	0	0.22093	0.155039	0.0426357	0.112403	0.399225	0.0542636	0.0155039	1
	Don't know/Haven't heard enough	Count	0	23	10	4	9	20	11	9	86
		% within Q68a. Performance: President	0	0.267442	0.116279	0.0465116	0.104651	0.232558	0.127907	0.104651	1
	Refused	Count	0	0	0	0	0	0	1	0	1
		% within Q68a. Performance: President	0	0	0	0	0	0	1	0	1
Total		Count	16	823	266	122	291	684	153	44	2399
		% within Q68a. Performance: President	0.00666945	0.34306	0.11088	0.0508545	0.121301	0.285119	0.0637766	0.018341	1
Q68b. Performance: MP/National Assembly rep. * Q65c. Pay more taxes to increase health spending Crosstabulation
			Q65c. Pay more taxes to increase health spending								Total
			Missing	Strongly oppose	Somewhat oppose	Neither support nor oppose	Somewhat support	Strongly support	It depends	Don't know
Q68b. Performance: MP/National Assembly rep.	Missing	Count	0	0	1	1	0	2	0	0	4
		% within Q68b. Performance: MP/National Assembly rep.	0	0	0.25	0.25	0	0.5	0	0	1
	Strongly Disapprove	Count	6	356	83	38	71	196	37	8	795
		% within Q68b. Performance: MP/National Assembly rep.	0.00754717	0.447799	0.104403	0.0477987	0.0893082	0.246541	0.0465409	0.0100629	1
	Disapprove	Count	5	232	98	40	101	182	59	10	727
		% within Q68b. Performance: MP/National Assembly rep.	0.00687758	0.31912	0.134801	0.0550206	0.138927	0.250344	0.0811554	0.0137552	1
	Approve	Count	5	148	49	27	77	206	31	7	550
		% within Q68b. Performance: MP/National Assembly rep.	0.00909091	0.269091	0.0890909	0.0490909	0.14	0.374545	0.0563636	0.0127273	1
	Strongly Approve	Count	0	51	23	6	22	68	12	4	186
		% within Q68b. Performance: MP/National Assembly rep.	0	0.274194	0.123656	0.0322581	0.11828	0.365591	0.0645161	0.0215054	1
	Don't know/Haven't heard enough	Count	0	36	12	10	20	31	12	16	137
		% within Q68b. Performance: MP/National Assembly rep.	0	0.262774	0.0875912	0.0729927	0.145985	0.226277	0.0875912	0.116788	1
	Refused	Count	0	0	0	0	0	0	1	0	1
		% within Q68b. Performance: MP/National Assembly rep.	0	0	0	0	0	0	1	0	1
Total		Count	16	823	266	122	291	685	152	45	2400
		% within Q68b. Performance: MP/National Assembly rep.	0.00666667	0.342917	0.110833	0.0508333	0.12125	0.285417	0.0633333	0.01875	1
Q52a. Trust president * Q65c. Pay more taxes to increase health spending Crosstabulation
			Q65c. Pay more taxes to increase health spending								Total
			Missing	Strongly oppose	Somewhat oppose	Neither support nor oppose	Somewhat support	Strongly support	It depends	Don't know
Q52a. Trust president	Missing	Count	0	2	0	0	0	0	0	0	2
		% within Q52a. Trust president	0	1	0	0	0	0	0	0	1
	Not at all	Count	5	392	75	36	84	195	45	9	841
		% within Q52a. Trust president	0.0059453	0.466112	0.0891795	0.0428062	0.0998811	0.231867	0.0535077	0.0107015	1
	Just a little	Count	2	161	81	36	59	135	44	13	531
		% within Q52a. Trust president	0.00376648	0.303202	0.152542	0.0677966	0.111111	0.254237	0.0828625	0.0244821	1
	Somewhat	Count	7	124	45	23	68	140	22	4	433
		% within Q52a. Trust president	0.0161663	0.286374	0.103926	0.0531178	0.157044	0.323326	0.0508083	0.00923788	1
	A lot	Count	2	129	56	22	73	208	34	12	536
		% within Q52a. Trust president	0.00373134	0.240672	0.104478	0.0410448	0.136194	0.38806	0.0634328	0.0223881	1
	Don't know/ Haven't heard enough	Count	0	17	7	6	8	7	8	7	60
		% within Q52a. Trust president	0	0.283333	0.116667	0.1	0.133333	0.116667	0.133333	0.116667	1
Total		Count	16	825	264	123	292	685	153	45	2403
		% within Q52a. Trust president	0.00665834	0.343321	0.109863	0.051186	0.121515	0.28506	0.0636704	0.0187266	1
Q52b. Trust parliament/national assembly * Q65c. Pay more taxes to increase health spending Crosstabulation
			Q65c. Pay more taxes to increase health spending								Total
			Missing	Strongly oppose	Somewhat oppose	Neither support nor oppose	Somewhat support	Strongly support	It depends	Don't know
Q52b. Trust parliament/national assembly	Missing	Count	0	4	0	0	1	0	0	0	5
		% within Q52b. Trust parliament/national assembly	0	0.8	0	0	0.2	0	0	0	1
	Not at all	Count	4	352	76	36	85	225	40	8	826
		% within Q52b. Trust parliament/national assembly	0.00484262	0.42615	0.0920097	0.0435835	0.102906	0.272397	0.0484262	0.00968523	1
	Just a little	Count	5	205	92	43	80	149	49	12	635
		% within Q52b. Trust parliament/national assembly	0.00787402	0.322835	0.144882	0.0677165	0.125984	0.234646	0.0771654	0.0188976	1
	Somewhat	Count	4	141	59	27	67	151	29	9	487
		% within Q52b. Trust parliament/national assembly	0.00821355	0.289528	0.12115	0.0554415	0.137577	0.310062	0.0595483	0.0184805	1
	A lot	Count	2	101	29	14	49	147	21	9	372
		% within Q52b. Trust parliament/national assembly	0.00537634	0.271505	0.077957	0.0376344	0.13172	0.395161	0.0564516	0.0241935	1
	Don't know/ Haven't heard enough	Count	2	21	9	3	10	13	13	7	78
		% within Q52b. Trust parliament/national assembly	0.025641	0.269231	0.115385	0.0384615	0.128205	0.166667	0.166667	0.0897436	1
Total		Count	17	824	265	123	292	685	152	45	2403
		% within Q52b. Trust parliament/national assembly	0.00707449	0.342905	0.110279	0.051186	0.121515	0.28506	0.0632543	0.0187266	1
Q52d. Trust tax department * Q65c. Pay more taxes to increase health spending Crosstabulation
			Q65c. Pay more taxes to increase health spending								Total
			Missing	Strongly oppose	Somewhat oppose	Neither support nor oppose	Somewhat support	Strongly support	It depends	Don't know
Q52d. Trust tax department	Missing	Count	1	6	4	0	3	1	1	0	16
		% within Q52d. Trust tax department	0.0625	0.375	0.25	0	0.1875	0.0625	0.0625	0	1
	Not at all	Count	3	385	78	43	86	220	47	15	877
		% within Q52d. Trust tax department	0.00342075	0.438997	0.0889396	0.0490308	0.0980616	0.250855	0.0535918	0.0171038	1
	Just a little	Count	8	199	94	40	68	163	44	5	621
		% within Q52d. Trust tax department	0.0128824	0.320451	0.151369	0.0644122	0.109501	0.26248	0.0708535	0.00805153	1
	Somewhat	Count	3	130	48	21	68	141	29	7	447
		% within Q52d. Trust tax department	0.00671141	0.290828	0.107383	0.0469799	0.152125	0.315436	0.064877	0.01566	1
	A lot	Count	2	79	31	12	50	147	21	8	350
		% within Q52d. Trust tax department	0.00571429	0.225714	0.0885714	0.0342857	0.142857	0.42	0.06	0.0228571	1
	Don't know/ Haven't heard enough	Count	0	25	10	7	17	13	9	10	91
		% within Q52d. Trust tax department	0	0.274725	0.10989	0.0769231	0.186813	0.142857	0.0989011	0.10989	1
Total		Count	17	824	265	123	292	685	151	45	2402
		% within Q52d. Trust tax department	0.00707744	0.343047	0.110325	0.0512073	0.121565	0.285179	0.0628643	0.0187344	1
Q50. Leaders serve interests of people or their own * Q65c. Pay more taxes to increase health spending Crosstabulation
			Q65c. Pay more taxes to increase health spending								Total
			Missing	Strongly oppose	Somewhat oppose	Neither support nor oppose	Somewhat support	Strongly support	It depends	Don't know
Q50. Leaders serve interests of people or their own	Missing	Count	0	0	0	4	0	0	1	0	5
		% within Q50. Leaders serve interests of people or their own	0	0	0	0.8	0	0	0.2	0	1
	More to serve their own political ambitions - strongly agree	Count	6	494	99	55	130	293	74	15	1166
		% within Q50. Leaders serve interests of people or their own	0.0051458	0.423671	0.0849057	0.0471698	0.111492	0.251286	0.0634648	0.0128645	1
	More to serve their own political ambitions - agree	Count	3	154	86	21	60	165	43	10	542
		% within Q50. Leaders serve interests of people or their own	0.00553506	0.284133	0.158672	0.0387454	0.110701	0.304428	0.0793358	0.0184502	1
	Neither agree nor disagree	Count	3	38	18	13	19	41	9	3	144
		% within Q50. Leaders serve interests of people or their own	0.0208333	0.263889	0.125	0.0902778	0.131944	0.284722	0.0625	0.0208333	1
	More to serve the people - agree	Count	1	53	26	16	39	80	6	6	227
		% within Q50. Leaders serve interests of people or their own	0.00440529	0.23348	0.114537	0.0704846	0.171806	0.352423	0.0264317	0.0264317	1
	More to serve the people - strongly agree	Count	2	60	28	7	34	88	14	6	239
		% within Q50. Leaders serve interests of people or their own	0.0083682	0.251046	0.117155	0.0292887	0.142259	0.368201	0.0585774	0.0251046	1
	Don't know	Count	2	25	9	7	10	17	4	5	79
		% within Q50. Leaders serve interests of people or their own	0.0253165	0.316456	0.113924	0.0886076	0.126582	0.21519	0.0506329	0.0632911	1
Total		Count	17	824	266	123	292	684	151	45	2402
		% within Q50. Leaders serve interests of people or their own	0.00707744	0.343047	0.110741	0.0512073	0.121565	0.284763	0.0628643	0.0187344	1
CROSSTABS
/TABLES=Q66G Q68A Q68B Q52A Q52B Q52D Q50 BY Q65C
/FORMAT=AVALUE TABLES
/CELLS=COUNT
/COUNT ROUND CELL.
Crosstabs
Notes
Output Created		31-MAY-2017 07:10:47
Comments
Input	Data	C:\Users\HP 15\Downloads\gha_r6_data (1).sav
	Active Dataset	DataSet1
	Filter	<none>
	Weight	within country weighting factor
	Split File	<none>
	N of Rows in Working Data File	2400
Missing Value Handling	Definition of Missing	User-defined missing values are treated as missing.
	Cases Used	Statistics for each table are based on all the cases with valid data in the specified range(s) for all variables in each table.
Syntax		CROSSTABS /TABLES=Q66G Q68A Q68B Q52A Q52B Q52D Q50 BY Q65C /FORMAT=AVALUE TABLES /CELLS=COUNT /COUNT ROUND CELL.
Resources	Processor Time	00:00:00.05
	Elapsed Time	00:00:00.06
	Dimensions Requested	2
	Cells Available	174762
[DataSet1] C:\Users\HP 15\Downloads\gha_r6_data (1).sav
Case Processing Summary
	Cases
	Valid		Missing		Total
	N	Percent	N	Percent	N	Percent
Q66g. Handling improving basic health services * Q65c. Pay more taxes to increase health spending	2399a	0.999583	1	0.000416667	2400	1
Q68a. Performance: President * Q65c. Pay more taxes to increase health spending	2399a	0.999583	1	0.000416667	2400	1
Q68b. Performance: MP/National Assembly rep. * Q65c. Pay more taxes to increase health spending	2400a	1	0	0	2400	1
Q52a. Trust president * Q65c. Pay more taxes to increase health spending	2403a	1	0	0	2400	1
Q52b. Trust parliament/national assembly * Q65c. Pay more taxes to increase health spending	2403a	1	0	0	2400	1
Q52d. Trust tax department * Q65c. Pay more taxes to increase health spending	2402a	1	0	0	2400	1
Q50. Leaders serve interests of people or their own * Q65c. Pay more taxes to increase health spending	2402a	1	0	0	2400	1
a. Number of valid cases is different from the total count in the crosstabulation table because the cell counts have been rounded.
Q66g. Handling improving basic health services * Q65c. Pay more taxes to increase health spending Crosstabulation
Count
		Q65c. Pay more taxes to increase health spending								Total
		Missing	Strongly oppose	Somewhat oppose	Neither support nor oppose	Somewhat support	Strongly support	It depends	Don't know
Q66g. Handling improving basic health services	Missing	0	1	1	0	0	1	0	0	3
	Very Badly	5	409	66	34	90	219	60	7	890
	Fairly Badly	7	193	101	35	72	121	28	14	571
	Fairly Well	4	174	72	40	95	242	46	10	683
	Very Well	0	32	18	7	28	89	9	1	184
	Don't know/Haven't heard enough	0	14	7	7	6	12	10	12	68
Total		16	823	265	123	291	684	153	44	2399
Q68a. Performance: President * Q65c. Pay more taxes to increase health spending Crosstabulation
Count
		Q65c. Pay more taxes to increase health spending								Total
		Missing	Strongly oppose	Somewhat oppose	Neither support nor oppose	Somewhat support	Strongly support	It depends	Don't know
Q68a. Performance: President	Missing	0	0	1	0	0	0	0	0	1
	Strongly Disapprove	3	424	68	38	70	207	44	9	863
	Disapprove	5	168	97	31	81	129	44	13	568
	Approve	8	151	50	38	102	225	39	9	622
	Strongly Approve	0	57	40	11	29	103	14	4	258
	Don't know/Haven't heard enough	0	23	10	4	9	20	11	9	86
	Refused	0	0	0	0	0	0	1	0	1
Total		16	823	266	122	291	684	153	44	2399
Q68b. Performance: MP/National Assembly rep. * Q65c. Pay more taxes to increase health spending Crosstabulation
Count
		Q65c. Pay more taxes to increase health spending								Total
		Missing	Strongly oppose	Somewhat oppose	Neither support nor oppose	Somewhat support	Strongly support	It depends	Don't know
Q68b. Performance: MP/National Assembly rep.	Missing	0	0	1	1	0	2	0	0	4
	Strongly Disapprove	6	356	83	38	71	196	37	8	795
	Disapprove	5	232	98	40	101	182	59	10	727
	Approve	5	148	49	27	77	206	31	7	550
	Strongly Approve	0	51	23	6	22	68	12	4	186
	Don't know/Haven't heard enough	0	36	12	10	20	31	12	16	137
	Refused	0	0	0	0	0	0	1	0	1
Total		16	823	266	122	291	685	152	45	2400
Q52a. Trust president * Q65c. Pay more taxes to increase health spending Crosstabulation
Count
		Q65c. Pay more taxes to increase health spending								Total
		Missing	Strongly oppose	Somewhat oppose	Neither support nor oppose	Somewhat support	Strongly support	It depends	Don't know
Q52a. Trust president	Missing	0	2	0	0	0	0	0	0	2
	Not at all	5	392	75	36	84	195	45	9	841
	Just a little	2	161	81	36	59	135	44	13	531
	Somewhat	7	124	45	23	68	140	22	4	433
	A lot	2	129	56	22	73	208	34	12	536
	Don't know/ Haven't heard enough	0	17	7	6	8	7	8	7	60
Total		16	825	264	123	292	685	153	45	2403
Q52b. Trust parliament/national assembly * Q65c. Pay more taxes to increase health spending Crosstabulation
Count
		Q65c. Pay more taxes to increase health spending								Total
		Missing	Strongly oppose	Somewhat oppose	Neither support nor oppose	Somewhat support	Strongly support	It depends	Don't know
Q52b. Trust parliament/national assembly	Missing	0	4	0	0	1	0	0	0	5
	Not at all	4	352	76	36	85	225	40	8	826
	Just a little	5	205	92	43	80	149	49	12	635
	Somewhat	4	141	59	27	67	151	29	9	487
	A lot	2	101	29	14	49	147	21	9	372
	Don't know/ Haven't heard enough	2	21	9	3	10	13	13	7	78
Total		17	824	265	123	292	685	152	45	2403
Q52d. Trust tax department * Q65c. Pay more taxes to increase health spending Crosstabulation
Count
		Q65c. Pay more taxes to increase health spending								Total
		Missing	Strongly oppose	Somewhat oppose	Neither support nor oppose	Somewhat support	Strongly support	It depends	Don't know
Q52d. Trust tax department	Missing	1	6	4	0	3	1	1	0	16
	Not at all	3	385	78	43	86	220	47	15	877
	Just a little	8	199	94	40	68	163	44	5	621
	Somewhat	3	130	48	21	68	141	29	7	447
	A lot	2	79	31	12	50	147	21	8	350
	Don't know/ Haven't heard enough	0	25	10	7	17	13	9	10	91
Total		17	824	265	123	292	685	151	45	2402
Q50. Leaders serve interests of people or their own * Q65c. Pay more taxes to increase health spending Crosstabulation
Count
		Q65c. Pay more taxes to increase health spending								Total
		Missing	Strongly oppose	Somewhat oppose	Neither support nor oppose	Somewhat support	Strongly support	It depends	Don't know
Q50. Leaders serve interests of people or their own	Missing	0	0	0	4	0	0	1	0	5
	More to serve their own political ambitions - strongly agree	6	494	99	55	130	293	74	15	1166
	More to serve their own political ambitions - agree	3	154	86	21	60	165	43	10	542
	Neither agree nor disagree	3	38	18	13	19	41	9	3	144
	More to serve the people - agree	1	53	26	16	39	80	6	6	227
	More to serve the people - strongly agree	2	60	28	7	34	88	14	6	239
	Don't know	2	25	9	7	10	17	4	5	79
Total		17	824	266	123	292	684	151	45	2402
CORRELATIONS
/VARIABLES=Q65C Q8C Q55C Q55D Q52A Q52B Q52D Q53A Q53B Q53F Q63C Q68A Q68B Q50 Q96A Q97 Q101
/PRINT=TWOTAIL NOSIG
/MISSING=PAIRWISE.
Correlations
Notes
Output Created		31-MAY-2017 09:10:35
Comments
Input	Data	C:\Users\HP 15\Downloads\gha_r6_data (1).sav
	Active Dataset	DataSet1
	Filter	<none>
	Weight	within country weighting factor
	Split File	<none>
	N of Rows in Working Data File	2400
Missing Value Handling	Definition of Missing	User-defined missing values are treated as missing.
	Cases Used	Statistics for each pair of variables are based on all the cases with valid data for that pair.
Syntax		CORRELATIONS /VARIABLES=Q65C Q8C Q55C Q55D Q52A Q52B Q52D Q53A Q53B Q53F Q63C Q68A Q68B Q50 Q96A Q97 Q101 /PRINT=TWOTAIL NOSIG /MISSING=PAIRWISE.
Resources	Processor Time	00:00:00.16
	Elapsed Time	00:00:00.86
[DataSet1] C:\Users\HP 15\Downloads\gha_r6_data (1).sav
Correlations
		Q65c. Pay more taxes to increase health spending	Q8c. How often gone without medical care	Q55c. Difficulty to obtain medical treatment	Q55d. Pay bribe for treatment at public clinic or hospital	Q52a. Trust president	Q52b. Trust parliament/national assembly	Q52d. Trust tax department	Q53a. Corruption: office of the Presidency	Q53b. Corruption: Members of Parliament	Q53f. Corruption: tax officials	Q63c. Ruling vs. opposition: improving health	Q68a. Performance: President	Q68b. Performance: MP/National Assembly rep.	Q50. Leaders serve interests of people or their own	Q96a. Occupation of respondent	Q97. Education of respondent	Q101. Gender of respondent
Q65c. Pay more taxes to increase health spending	Pearson Correlation	1	0.0033649	-0.0343414	-0.021602	.147**	.121**	.136**	-0.00520743	0.03263	0.0210668	0.0138646	.136**	.130**	.085**	-.068**	-.063**	.050*
	Sig. (2-tailed)		0.869133	0.0925689	0.290124	4.00679e-13	2.46262e-09	2.50445e-11	0.798739	0.110014	0.302243	0.4972	2.07919e-11	1.80591e-10	3.02234e-05	0.000830975	0.00196557	0.0150164
	N	2400	2400	2400	2400	2400	2400	2400	2400	2400	2400	2400	2400	2400	2400	2400	2400	2400
Q8c. How often gone without medical care	Pearson Correlation	0.0033649	1	-.047*	-.054**	0.010904	6.57567e-05	0.02395	0.0252979	0.00649801	-0.0137374	-0.0129107	-0.00230348	0.000666869	0.00145058	-0.0228595	-.120**	0.0200059
	Sig. (2-tailed)	0.869133		0.0215176	0.00778124	0.593396	0.997431	0.240851	0.215386	0.750353	0.501156	0.527264	0.910198	0.973951	0.943376	0.26295	3.54942e-09	0.327248
	N	2400	2400	2400	2400	2400	2400	2400	2400	2400	2400	2400	2400	2400	2400	2400	2400	2400
Q55c. Difficulty to obtain medical treatment	Pearson Correlation	-0.0343414	-.047*	1	.954**	-0.0248094	0.00349862	-0.0183591	-0.00745273	0.0252334	0.0285277	-0.00079627	-0.0068332	-0.0173527	-0.00498895	0.00907719	0.00216426	-.044*
	Sig. (2-tailed)	0.0925689	0.0215176		0	0.22438	0.863982	0.368645	0.715169	0.216557	0.162377	0.968899	0.737937	0.395478	0.807012	0.656705	0.915605	0.0298311
	N	2400	2400	2400	2400	2400	2400	2400	2400	2400	2400	2400	2400	2400	2400	2400	2400	2400
Q55d. Pay bribe for treatment at public clinic or hospital	Pearson Correlation	-0.021602	-.054**	.954**	1	-0.00198857	0.0225059	0.0085198	0.0091783	.043*	.048*	0.00467727	0.0108976	0.00100821	0.00692201	0.00616617	-0.0027058	-.058**
	Sig. (2-tailed)	0.290124	0.00778124	0		0.922433	0.270407	0.676552	0.65313	0.0331708	0.0189835	0.818853	0.593611	0.960628	0.734658	0.762709	0.894598	0.00450813
	N	2400	2400	2400	2400	2400	2400	2400	2400	2400	2400	2400	2400	2400	2400	2400	2400	2400
Q52a. Trust president	Pearson Correlation	.147**	0.010904	-0.0248094	-0.00198857	1	.677**	.565**	.154**	.167**	.204**	.091**	.319**	.212**	.218**	-0.0166829	-.094**	-0.000329868
	Sig. (2-tailed)	4.00679e-13	0.593396	0.22438	0.922433		0	6.96782e-203	3.81366e-14	1.59562e-16	6.28514e-24	7.44193e-06	6.52553e-58	8.1445e-26	2.78696e-27	0.413971	3.91327e-06	0.987113
	N	2400	2400	2400	2400	2400	2400	2400	2400	2400	2400	2400	2400	2400	2400	2400	2400	2400
Q52b. Trust parliament/national assembly	Pearson Correlation	.121**	6.57567e-05	0.00349862	0.0225059	.677**	1	.611**	.192**	.238**	.214**	.092**	.255**	.210**	.255**	-0.0160221	-.101**	0.0281045
	Sig. (2-tailed)	2.46262e-09	0.997431	0.863982	0.270407	0		7.90638e-246	2.65299e-21	2.60396e-32	2.90539e-26	7.06228e-06	5.86107e-37	2.17096e-25	6.879e-37	0.432711	7.07831e-07	0.168702
	N	2400	2400	2400	2400	2400	2400	2400	2400	2400	2400	2400	2400	2400	2400	2400	2400	2400
Q52d. Trust tax department	Pearson Correlation	.136**	0.02395	-0.0183591	0.0085198	.565**	.611**	1	.219**	.215**	.218**	.158**	.219**	.184**	.239**	-0.0256269	-.106**	0.0275321
	Sig. (2-tailed)	2.50445e-11	0.240851	0.368645	0.676552	6.96782e-203	7.90638e-246		1.46036e-27	1.90494e-26	4.21712e-27	7.86411e-15	1.98496e-27	1.20655e-19	2.06565e-32	0.209475	1.71902e-07	0.177547
	N	2400	2400	2400	2400	2400	2400	2400	2400	2400	2400	2400	2400	2400	2400	2400	2400	2400
Q53a. Corruption: office of the Presidency	Pearson Correlation	-0.00520743	0.0252979	-0.00745273	0.0091783	.154**	.192**	.219**	1	.784**	.677**	.189**	.142**	.177**	.154**	-0.0135059	-.056**	.050*
	Sig. (2-tailed)	0.798739	0.215386	0.715169	0.65313	3.81366e-14	2.65299e-21	1.46036e-27		0	0	1.12734e-20	2.93947e-12	2.75088e-18	3.63786e-14	0.508398	0.00634114	0.0145897
	N	2400	2400	2400	2400	2400	2400	2400	2400	2400	2400	2400	2400	2400	2400	2400	2400	2400
Q53b. Corruption: Members of Parliament	Pearson Correlation	0.03263	0.00649801	0.0252334	.043*	.167**	.238**	.215**	.784**	1	.728**	.173**	.182**	.197**	.149**	-0.0189743	-.060**	.061**
	Sig. (2-tailed)	0.110014	0.750353	0.216557	0.0331708	1.59562e-16	2.60396e-32	1.90494e-26	0		0	1.60327e-17	3.06766e-19	1.78537e-22	2.54684e-13	0.352812	0.00354124	0.00267769
	N	2400	2400	2400	2400	2400	2400	2400	2400	2400	2400	2400	2400	2400	2400	2400	2400	2400
Q53f. Corruption: tax officials	Pearson Correlation	0.0210668	-0.0137374	0.0285277	.048*	.204**	.214**	.218**	.677**	.728**	1	.181**	.181**	.188**	.112**	-0.0159474	-.069**	.071**
	Sig. (2-tailed)	0.302243	0.501156	0.162377	0.0189835	6.28514e-24	2.90539e-26	4.21712e-27	0	0		3.97827e-19	3.50262e-19	1.50395e-20	4.2638e-08	0.434861	0.000729939	0.000522254
	N	2400	2400	2400	2400	2400	2400	2400	2400	2400	2400	2400	2400	2400	2400	2400	2400	2400
Q63c. Ruling vs. opposition: improving health	Pearson Correlation	0.0138646	-0.0129107	-0.00079627	0.00467727	.091**	.092**	.158**	.189**	.173**	.181**	1	.167**	.182**	.097**	0.00376229	-0.0325954	.046*
	Sig. (2-tailed)	0.4972	0.527264	0.968899	0.818853	7.44193e-06	7.06228e-06	7.86411e-15	1.12734e-20	1.60327e-17	3.97827e-19		2.11366e-16	2.0486e-19	1.72399e-06	0.853842	0.110391	0.0246798
	N	2400	2400	2400	2400	2400	2400	2400	2400	2400	2400	2400	2400	2400	2400	2400	2400	2400
Q68a. Performance: President	Pearson Correlation	.136**	-0.00230348	-0.0068332	0.0108976	.319**	.255**	.219**	.142**	.182**	.181**	.167**	1	.777**	.194**	0.00246661	-.069**	-0.0038521
	Sig. (2-tailed)	2.07919e-11	0.910198	0.737937	0.593611	6.52553e-58	5.86107e-37	1.98496e-27	2.93947e-12	3.06766e-19	3.50262e-19	2.11366e-16		0	8.76785e-22	0.903868	0.000759336	0.850394
	N	2400	2400	2400	2400	2400	2400	2400	2400	2400	2400	2400	2400	2400	2400	2400	2400	2400
Q68b. Performance: MP/National Assembly rep.	Pearson Correlation	.130**	0.000666869	-0.0173527	0.00100821	.212**	.210**	.184**	.177**	.197**	.188**	.182**	.777**	1	.187**	-0.0161404	-.048*	0.0290391
	Sig. (2-tailed)	1.80591e-10	0.973951	0.395478	0.960628	8.1445e-26	2.17096e-25	1.20655e-19	2.75088e-18	1.78537e-22	1.50395e-20	2.0486e-19	0		2.10808e-20	0.429321	0.0176581	0.154974
	N	2400	2400	2400	2400	2400	2400	2400	2400	2400	2400	2400	2400	2400	2400	2400	2400	2400
Q50. Leaders serve interests of people or their own	Pearson Correlation	.085**	0.00145058	-0.00498895	0.00692201	.218**	.255**	.239**	.154**	.149**	.112**	.097**	.194**	.187**	1	-0.0265633	-.114**	0.0350053
	Sig. (2-tailed)	3.02234e-05	0.943376	0.807012	0.734658	2.78696e-27	6.879e-37	2.06565e-32	3.63786e-14	2.54684e-13	4.2638e-08	1.72399e-06	8.76785e-22	2.10808e-20		0.193298	1.87943e-08	0.0864302
	N	2400	2400	2400	2400	2400	2400	2400	2400	2400	2400	2400	2400	2400	2400	2400	2400	2400
Q96a. Occupation of respondent	Pearson Correlation	-.068**	-0.0228595	0.00907719	0.00616617	-0.0166829	-0.0160221	-0.0256269	-0.0135059	-0.0189743	-0.0159474	0.00376229	0.00246661	-0.0161404	-0.0265633	1	.107**	-0.019691
	Sig. (2-tailed)	0.000830975	0.26295	0.656705	0.762709	0.413971	0.432711	0.209475	0.508398	0.352812	0.434861	0.853842	0.903868	0.429321	0.193298		1.52304e-07	0.334922
	N	2400	2400	2400	2400	2400	2400	2400	2400	2400	2400	2400	2400	2400	2400	2400	2400	2400
Q97. Education of respondent	Pearson Correlation	-.063**	-.120**	0.00216426	-0.0027058	-.094**	-.101**	-.106**	-.056**	-.060**	-.069**	-0.0325954	-.069**	-.048*	-.114**	.107**	1	-.096**
	Sig. (2-tailed)	0.00196557	3.54942e-09	0.915605	0.894598	3.91327e-06	7.07831e-07	1.71902e-07	0.00634114	0.00354124	0.000729939	0.110391	0.000759336	0.0176581	1.87943e-08	1.52304e-07		2.67259e-06
	N	2400	2400	2400	2400	2400	2400	2400	2400	2400	2400	2400	2400	2400	2400	2400	2400	2400
Q101. Gender of respondent	Pearson Correlation	.050*	0.0200059	-.044*	-.058**	-0.000329868	0.0281045	0.0275321	.050*	.061**	.071**	.046*	-0.0038521	0.0290391	0.0350053	-0.019691	-.096**	1
	Sig. (2-tailed)	0.0150164	0.327248	0.0298311	0.00450813	0.987113	0.168702	0.177547	0.0145897	0.00267769	0.000522254	0.0246798	0.850394	0.154974	0.0864302	0.334922	2.67259e-06
	N	2400	2400	2400	2400	2400	2400	2400	2400	2400	2400	2400	2400	2400	2400	2400	2400	2400
**. Correlation is significant at the 0.01 level (2-tailed).
*. Correlation is significant at the 0.05 level (2-tailed).
